# Supplementary material for: Evidencing a reaction intermediate in the formation of the EuIII bimetallic complex with p-tert-butylcalix[8]arene
Source: Royal Society of Chemistry journal article supplement (doi:10.1039/b500850f), 2005-01-01
Supplement: b500850f.doc [file b500850f.doc]

**Evidencing reaction intermediates in the formation of EuIII-containing mono-and bimetallic complexes with *p-tert*-butylcalix8arene**

____________________________________________________________________

Jean-Claude G. Bünzli* and Frédéric Besançon

*Laboratory of Lanthanide Supramolecular Chemistry, école Polytechnique Fédérale de Lausanne (EPFL), CH-1015 Lausanne (Switzerland)*

**Electronic supplementary information**

**(6 pages)**

**Figure S1.** Formation of the bimetallic complexEu2(n-LH2)(dmf)5 in dmf determined by monitoring the 5D07F0 transition. (Top) Factor indicator for a typical kinetic experiment and (bottom), number of significant factors for the 44 experiments.

**Figure S2.** ES-MS spectrum of a solution of [Eu(*b*-LH6)(NO3)(dmf)4] in dmf (positive mode).

**Figure S3.** ES-MS spectrum of a solution of [Eu(*b*-LH6)(NO3)(dmf)4] in dmf (negative mode).

**Figure S4.** Variable-pressure study of the 5D07F0 transition of the [Eu(*b*-LH6)(NO3)(dmf)4] complex 1.0310-2 M in dmf at 310 K, between 0.1 and 202.2 MPa.

**Figure S5.** Experimental data fitted to equation (7) for the determination of the thermodynamic parameters of equilibrium (5). The complex concentration is 9.9510-3 M in dmf, *P* = 0.1 MPa, temperature between 247 and 319 K.

**Figure S6** Evolution of the 5D07F0 transition of a solution of [Eu(*b*-LH6)(NO3)(dmf)4] 4.9710-3 M in dmf containing 18 equivalents of Et3N upon addition of Eu(NO3)3·(dmso)x (0-1 equivalent), at 298 K.

**Figure S7.** Variation of the 5D07F0 absorption spectrum of a solution of [Eu(*b*-LH6)(NO3)(dmf)4]4.9710-3 M in dmf upon addition of 0.05 to 5.7 equivalents of acetic acid, at 298 K.

**Figure S8.** Variation of the 5D07F0 absorption spectrum of a solution of [Eu(*b*-LH6)(NO3)(dmf)4]9.5510-3 M in dmf upon addition of 0.5 and 18 equivalents of triethylamine, at 298 K.

**Figure S9.** Typical baseline correction for a 5D07F0 spectrum (2:1 complex, 510-3 M in dmf, 298 K).
